# Supplementary material
Source: publisher figshare collection journal article supplement (https://gsapubs.figshare.com/ndownloader/files/40576790)
Supplement: Supplementary file 1 [file 40576790]

## Sheet: Sheet1
	Table S1: Cameca secondary ion mass spectrometry (SIMS) zircon and baddeleyite U-Pb isotopic analyses for the late Mesoproterozoic mafic rocks from the Huili-Dongchuan area, southwestern Yangtze Block
	Sample	U	Th	Th/U	206Pb/204Pb	f206	Isotopic ratio							Age/Ma					Sample	U	Pb	206Pb/204Pb	Isotopic ratio					Age/Ma
	Spot #	(ppm)	(ppm)		measured	(%)	207Pb*/206Pb*	±1σ (%)	207Pb*/235U	±1σ (%)	206Pb*/238U	±1σ (%)		206Pb*/238U	±1σ	207Pb*/206Pb*	±1σ		Spot #	(ppm)	(ppm)	measured	207Pb*/206Pb*	±1σ (%)	204Pb*/206Pb*	±1σ (%)		207Pb*/206Pb*	±1σ
	YB1310 zircon, Boka dolerites ( N 26°23'54.3'', E 103°03'45.7'')																		YB1310 baddeleyite, Boka dolerites ( N 26°23'54.3'', E 103°03'45.7'')
	1	378.478	400.002	1.05687	9593.16	0.19	0.0770338	0.771671	2.05187	1.68845	0.193182	1.50179		1138.59	15.6934	1122.07	15.3105		1	n/a	n/a	285526	0.0777217	0.0964059	3.50231e-06	13.0189		1139.77	3.83122
	2	242.331	245.037	1.01117	8340.9	0.22	0.0772217	0.663997	2.07882	1.6408	0.195243	1.50044		1149.72	15.8194	1126.92	13.1738		2	n/a	n/a	34932.8	0.0782595	0.0860489	2.86264e-05	6.40173		1153.47	3.41277
	3	202.067	169.859	0.840608	7251.03	0.26	0.0772532	0.642054	2.07579	1.63475	0.194879	1.50338		1147.75	15.8257	1127.73	12.7388		3	n/a	n/a	15764.5	0.0785857	0.0695874	6.34337e-05	3.65143		1161.72	2.75657
	4	400.179	421.818	1.05407	12743.6	0.15	0.0773975	0.657069	2.08205	1.64496	0.195103	1.50803		1148.96	15.8899	1131.45	13.0283		4	n/a	n/a	208913	0.0777749	0.120666	4.78668e-06	17.2542		1141.13	4.79437
	5	733.722	868.222	1.18331	21701.5	0.09	0.0774834	0.304716	2.07812	1.53192	0.194518	1.50131		1145.81	15.7793	1133.66	6.05362		5	n/a	n/a	4859.3	0.0797892	0.1538	0.000205791	3.1763		1191.78	6.0659
	6	500.204	467.974	0.935566	13646.6	0.14	0.0777665	0.367907	2.07312	1.545	0.193344	1.50055		1139.46	15.6914	1140.91	7.29824		6	n/a	n/a	227062	0.0777212	0.0978767	4.40409e-06	10.9128		1139.76	3.88968
	7	1257.63	2304.59	1.83249	16857	0.11	0.0777737	0.231805	2.134	1.52113	0.199003	1.50337		1169.96	16.1052	1141.1	4.60227		7	n/a	n/a	8418.72	0.0792245	0.16626	0.000118783	3.62533		1177.75	6.57071
	8	628.698	997.137	1.58604	18387.3	0.1	0.0777772	0.551156	2.12236	1.64594	0.197909	1.55092		1164.08	16.5389	1141.19	10.9201		8	n/a	n/a	49608.4	0.0779632	0.111243	2.01579e-05	9.42031		1145.94	4.41687
	9	1262.18	1993.45	1.57938	13728.5	0.14	0.0778117	0.282721	2.13029	1.57045	0.19856	1.5448		1167.58	16.5188	1142.07	5.61051		9	n/a	n/a	614465	0.0776956	0.06444	1.62743e-06	11.9523		1139.1	2.56113
	10	703.448	963.58	1.36979	11590.9	0.16	0.0778172	0.355765	2.12409	1.54317	0.197968	1.50161		1164.4	16.0164	1142.21	7.05659		10	n/a	n/a	30706.9	0.0781858	0.127472	3.2566e-05	8.15175		1151.6	5.05703
	11	1113.17	1569.05	1.40954	28723.6	0.07	0.0778597	0.302416	2.11187	1.53098	0.196722	1.50082		1157.69	15.9236	1143.29	5.99952		11	n/a	n/a	4549.41	0.0799434	0.705161	0.000219809	18.0965		1195.59	27.7964
	12	1082.33	1518.92	1.40338	31176	0.06	0.0778617	0.27411	2.09904	1.55468	0.195522	1.53032		1151.22	16.1541	1143.35	5.43891		12	n/a	n/a	18802	0.0784644	0.173912	5.31859e-05	10.1433		1158.66	6.89226
	13	335.261	359.606	1.07262	14152.9	0.13	0.0778927	0.540406	2.08215	1.61966	0.193871	1.52684		1142.31	16.0032	1144.14	10.7032		13	n/a	n/a	7435.2	0.0794029	0.2163	0.000134495	5.17801		1182.2	8.5428
	14	1134.56	1781.65	1.57035	17616.8	0.11	0.0779106	0.312173	2.12519	1.53371	0.197833	1.5016		1163.67	16.0072	1144.6	6.19151		LNP1202 baddeleyite, Lanniping gabbros (GPS not available)
	15	1132.56	1746.83	1.54238	19437.5	0.1	0.078019	0.278987	2.11122	1.52606	0.19626	1.50034		1155.2	15.8872	1147.36	5.53225		1	243.964	43.5284	1995.07	0.074885	0.821344	0.000501236	n/a		1065.42	33.032
	16	429.755	696.398	1.62046	10330.9	0.18	0.0780815	0.469198	2.13089	1.57591	0.19793	1.50444		1164.19	16.0441	1148.95	9.29054		2	853.478	154.215	139352	0.0753514	0.201446	7.1761e-06	n/a		1077.89	8.08645
	17	620.587	742.199	1.19596	12430.3	0.15	0.078127	0.376317	2.13264	1.54686	0.197978	1.50039		1164.45	16.004	1150.1	7.45461		3	418.151	75.562	368481	0.0753544	0.319937	2.71384e-06	n/a		1077.97	12.8427
	18	1449.91	2164.69	1.49298	16588.5	0.11	0.0783154	0.29021	2.12848	1.52866	0.197116	1.50086		1159.81	15.9508	1154.88	5.74804		4	330.591	60.2323	1231.8	0.0756625	1.10178	0.00081182	n/a		1086.15	44.1732
	19	329.193	359.747	1.09282	8079.59	0.23	0.0785006	0.480742	2.13008	1.59393	0.196798	1.5197		1158.1	16.1294	1159.57	9.50364		5	1311.91	237.537	1.09767e+06	0.075428	0.145589	9.11021e-07	n/a		1079.93	5.84246
	TA1423 zircon, Tong'an dikes ( N 26°19'51.9'', E 102°18'30.0'')																		6	35.5646	6.01019	56220.9	0.0729769	1.08764	1.7787e-05	n/a		1013.31	44.0868
	1	741.098	1465.47	1.97743	22293.9	0.08	0.0746708	0.339117	1.83837	1.53845	0.178559	1.5006		1059.1	14.6727	1059.65	6.81001		7	1141	208.503	177849	0.0757745	0.285577	5.62274e-06	n/a		1089.12	11.4444
	2	817.608	943.976	1.15456	1858.19	1.01	0.0753314	0.953627	1.84884	1.77781	0.178001	1.50041		1056.05	14.6318	1077.36	19.024		8	965.388	172.966	86076.1	0.0750378	0.208832	1.16176e-05	n/a		1069.52	8.39343
	3	930.196	879.712	0.945727	n/a	n/a	0.0746841	0.282861	1.87297	1.52648	0.181887	1.50004		1077.27	14.8987	1060.01	5.68206		9	416.043	73.71	698854	0.0746286	0.261909	1.43091e-06	n/a		1058.52	10.5441
	4	426.453	374.566	0.87833	n/a	n/a	0.0748888	0.421428	1.84235	1.56071	0.178424	1.50274		1058.36	14.6841	1065.52	8.45099		10	350.207	62.1144	3766.37	0.0746686	0.86308	0.000265507	n/a		1059.59	34.7408
	5	489.655	364.193	0.743775	1321.2	1.42	0.0755606	0.824456	1.86216	1.71309	0.17874	1.50165		1060.09	14.6955	1083.45	16.4459		11	880.68	158.88	509646	0.0752929	0.221714	1.96215e-06	n/a		1076.33	8.90213
	6	364.81	300.025	0.822414	n/a	n/a	0.075174	0.456664	1.84802	1.56939	0.178295	1.50148		1057.65	14.6627	1073.16	9.14506		12	142.828	25.464	n/a	0.0748568	0.45003	n/a	n/a		1064.66	18.1009
	7	721.229	443.863	0.615426	137152	0.01	0.0744722	0.329547	1.82349	1.53759	0.177586	1.50186		1053.77	14.6169	1054.29	6.62356		13	477.791	82.5703	351651	0.0737448	0.290099	2.84373e-06	n/a		1034.49	11.7214
	8	366.257	128.337	0.350401	17772.8	0.11	0.0749448	0.663062	1.84648	1.64193	0.178691	1.50209		1059.82	14.6964	1067.02	13.2728		14	3174.76	571.358	1.70104e+06	0.0752028	0.138873	5.87874e-07	n/a		1073.93	5.57795
	9	313.815	216.07	0.688527	42940.2	0.04	0.0750761	0.507141	1.84888	1.58816	0.17861	1.50501		1059.38	14.7194	1070.54	10.1565		15	4061.6	730.445	692994	0.0751766	0.157279	1.44301e-06	n/a		1073.23	6.31789
	10	450.682	263.94	0.585647	n/a	n/a	0.0749651	0.407888	1.84817	1.55447	0.178806	1.5		1060.45	14.684	1067.57	8.17768		16	1590.9	285.091	1.35155e+06	0.0750449	0.4516	7.39892e-07	n/a		1069.71	18.1503
	11	472.178	843.436	1.78627	n/a	n/a	0.0749767	0.397218	1.87032	1.55839	0.180921	1.50691		1072.01	14.8997	1067.88	7.96396		17	92.2282	16.1449	4491.75	0.0741977	0.86227	0.000222631	n/a		1046.85	34.7748
	12	779.191	1354.71	1.73861	20071.2	0.09	0.0751232	0.479921	1.83774	1.57519	0.177423	1.5003		1052.88	14.5903	1071.8	9.61131		LNP1203 baddeleyite, Lanniping gabbros (GPS not available)
	13	835.799	1722.09	2.06041	n/a	n/a	0.0747796	0.299108	1.84369	1.5297	0.178815	1.50017		1060.5	14.6863	1062.58	6.00548		1	1219.53	219.159	1.64171e+06	0.0751491	0.168558	6.09119e-07	n/a		1072.49	6.77173
	14	217.088	162.298	0.747616	10834.1	0.17	0.0754563	0.716192	1.83252	1.66222	0.176138	1.50001		1045.84	14.4976	1080.68	14.3022		2	568.77	103.204	784857	0.0755086	0.316712	1.27412e-06	n/a		1082.07	12.7055
	15	411.491	625.075	1.51905	n/a	n/a	0.0748062	0.42653	1.83247	1.56348	0.177664	1.50417		1054.2	14.6449	1063.3	8.55587		3	1296.43	231.586	6470.39	0.0749283	0.283912	0.00015455	n/a		1066.58	11.4161
	16	357.054	2072.91	5.80561	n/a	n/a	0.0754269	0.691768	1.88722	1.65253	0.181465	1.50077		1074.98	14.8767	1079.9	13.8183		4	614.74	110.061	274796	0.0750111	0.236514	3.63907e-06	n/a		1068.8	9.50705
	17	635.602	596.748	0.938871	6856.19	0.27	0.0748192	0.591649	1.81142	1.61325	0.175592	1.50084		1042.85	14.4673	1063.65	11.8547		5	381.818	68.3592	1.02952e+06	0.0750109	0.297746	9.71331e-07	n/a		1068.79	11.9684
	Qinghu zircon (Standard)																		6	141.399	25.2799	391221	0.0749593	0.48978	2.5561e-06	n/a		1067.41	19.6916
	1	1117.64	413.075	0.369594	n/a	0.19	0.0494474	0.823272	0.16948	1.7178	0.0248584	1.50767		158.288	2.35783	169.102	19.1147		7	1379.77	250.356	31794.4	0.0755076	0.184357	3.1452e-05	n/a		1082.04	7.39585
	2	938.208	502.725	0.535836	n/a	0.12	0.0495077	0.7464	0.167076	1.7607	0.024476	1.59467		155.882	2.45646	171.946	17.3303		8	995.296	176.256	38458.6	0.0746123	0.243125	2.6002e-05	n/a		1058.08	9.78854
	3	1206.9	503.02	0.416786	n/a	0.1	0.0493056	0.793903	0.170723	1.71625	0.0251127	1.52159		159.888	2.40335	162.39	18.4594		9	694.586	125.62	326853	0.0753856	0.294505	3.05948e-06	n/a		1078.8	11.8204
	4	1145.68	466.931	0.40756	n/a	0.07	0.0490447	0.762613	0.169638	1.68287	0.025086	1.50016		159.719	2.36704	149.969	17.7763		10	475.001	85.7199	1.34101e+06	0.0753045	0.262663	7.45705e-07	n/a		1076.64	10.5458
	5	1022.5	403.136	0.394263	n/a	0.08	0.0492871	1.28538	0.171005	1.97584	0.0251637	1.50059		160.208	2.37487	161.513	29.7879		11	318.231	56.9858	25626.6	0.0750181	0.344752	3.9022e-05	n/a		1068.99	13.8575
	6	1299.92	666.927	0.513052	18.7033	0.1	0.0489626	1.1215	0.170475	1.90556	0.025252	1.54058		160.763	2.44652	146.039	26.0942		12	273.84	49.379	n/a	0.0752751	0.344326	n/a	n/a		1075.86	13.8261
	7	1360.66	642.209	0.471985	18.7033	0.11	0.0492592	1.12108	0.17137	1.88691	0.0252317	1.51776		160.636	2.40839	160.186	26.0169		13	532.792	96.4334	779148	0.0754145	0.280027	1.28345e-06	n/a		1079.57	11.238
	8	2739.37	921.189	0.336278	n/a	0.1	0.0494055	0.955701	0.171508	1.77914	0.0251772	1.50066		160.293	2.37623	167.12	22.1767		14	200.17	36.2187	13080.9	0.0754029	0.505451	7.64475e-05	n/a		1079.26	20.2856
																			15	308.568	55.5567	241903	0.0752189	0.364274	4.13389e-06	n/a		1074.36	14.6304
																			16	409.407	73.3149	1.10624e+06	0.0750192	0.279669	9.03966e-07	n/a		1069.02	11.2414
	f206 is the percentage of common 206Pb in total 206Pb; Common Pb corrected using the measured 204Pb; n/a, not available.																		17	276.32	49.7255	19927.6	0.0752002	0.44298	5.01818e-05	n/a		1073.86	17.7928
	GPS data for LNP1202 and LNP1203 are not available. These two samples were collected from a location close to sample LNP1406 ( N 26°10'52.9'', E 103°00'34.41''; Yang, 2016). Our dating results for these two samples are identical to that of sample LNP1406 (1072 ± 3.1 Ma; unpublished data by Yang, 2016).																		TA1607 baddeleyite, Tong'an dikes ( N 26°19'53.2'', E 102°18'21.6'')
	Yang, S.Q., 2016, Genetic relationship between Proterozoic mafic magmatism and Fe-Cu deposits from northeastern Yunnan Province, and its tectonic significance [Ph.D thesis]: Beijing, University of Chinese Academy of Sciences, 1–117 p.																		1	817.834	144.935	14850.2	0.0746387	0.175147	6.7339e-05	n/a		1058.79	7.0509
																			2	782.628	139.665	222574	0.0748922	0.186057	4.49289e-06	n/a		1065.61	7.48243
																			3	344.383	61.3189	45987.5	0.0748096	0.242893	2.17451e-05	n/a		1063.39	9.77139
																			4	183.889	33.0081	14401.1	0.0751063	0.359385	6.94391e-05	n/a		1071.35	14.4405
																			5	73.7661	13.5486	48946.1	0.0759683	0.508596	2.04306e-05	n/a		1094.23	20.3663
																			6	168.091	29.5711	10676.9	0.0743746	0.706924	9.36599e-05	n/a		1051.65	28.4892
																			7	168.994	30.7945	6889.4	0.075668	1.37926	0.000145151	n/a		1086.3	55.2967
																			8	200.021	35.0172	2136.27	0.0742006	0.651976	0.000468107	n/a		1046.93	26.2935
																			TA1608 baddeleyite, Tong'an dikes ( N 26°19'52.1'', E 102°18'29.9'')
																			1	474.446	84.3202	81665.9	0.0747419	0.3264	1.2245e-05	n/a		1061.57	13.1344
																			2	408.658	72.9386	38583.2	0.0748976	0.230747	2.5918e-05	n/a		1065.75	9.27947
																			3	1125.22	197.471	9260.7	0.0742876	0.230579	0.000107983	n/a		1049.29	9.2957
																			4	370.439	64.721	2937.28	0.0741289	0.61795	0.000340451	n/a		1044.98	24.9286
																			5	364.586	64.3291	7333.83	0.0744807	0.677996	0.000136354	n/a		1054.52	27.3116
																			6	221.47	39.7441	3369.38	0.0750972	0.586231	0.00029679	n/a		1071.1	23.5564
																			7	766.291	141.071	1041.44	0.0760569	2.42436	0.000960205	n/a		1096.57	97.048
																			8	137.339	24.2875	3867.89	0.0745623	0.753828	0.000258539	n/a		1056.73	30.3563
																			Phalaborwa baddeleyite (Standard)
																			1	n/a	n/a	1.95989e+06	0.127548	0.400118	5.10233e-07	n/a		2064.45	14.102
																			2	n/a	n/a	1.95989e+06	0.127094	0.190745	5.10233e-07	n/a		2058.15	6.72752
																			3	n/a	n/a	779771	0.1267	0.173095	1.28243e-06	n/a		2052.68	6.10884
																			4	n/a	n/a	1.33368e+06	0.127008	0.150297	7.49807e-07	n/a		2056.97	5.30166
																			5	n/a	n/a	568049	0.126931	0.184972	1.76041e-06	n/a		2055.9	6.52558
																			6	n/a	n/a	675619	0.126992	0.181548	1.48012e-06	n/a		2056.75	6.40417
																			7	n/a	n/a	248884	0.12798	0.23059	4.01794e-06	n/a		2070.41	8.12155
																			8	n/a	n/a	599827	0.127274	0.119335	1.66715e-06	n/a		2060.66	4.20773
																			9	n/a	n/a	381305	0.126925	0.161988	2.62257e-06	n/a		2055.81	5.7148
																			10	n/a	n/a	423895	0.127233	0.139183	2.35907e-06	n/a		2060.09	4.90787
																			11	n/a	n/a	317281	0.127138	0.137837	3.15178e-06	n/a		2058.78	4.86114
																			12	n/a	n/a	881447	0.127309	0.101079	1.1345e-06	n/a		2061.14	3.56382
	Errors are 1σ; f206 is the percentage of common 206Pb in total 206Pb; Common Pb corrected using the measured 204Pb. n/a, not available.
